# Supplementary material for: Human gingival mesenchymal stem cells retain their growth and immunomodulatory characteristics independent of donor age
Source: PubMed Central journal article supplement — Sci Adv. 2022 Jun 24;8(25):eabm6504. doi: 10.1126/sciadv.abm6504 (PMC9232118; doi:10.1126/sciadv.abm6504), 2022-06-24
Supplement: sciadv.abm6504_sm.pdf [file sciadv.abm6504_sm.pdf]

Supplementary Materials for  
**Human gingival mesenchymal stem cells retain their growth and immunomodulatory characteristics independent of donor age**

Jay R. Dave *et al.*

Corresponding author: Geetanjali B. Tomar, [geetanjalitomar13@gmail.com](mailto:geetanjalitomar13@gmail.com)

*Sci. Adv.* **8**, eabm6504 (2022)  
DOI: 10.1126/sciadv.abm6504

**The PDF file includes:**

Figs. S1 and S2  
Tables S1 to S3  
Legend for movie S1

**Other Supplementary Material for this manuscript includes the following:**

Movie S1

SUPPLEMENTARY MATERIALS

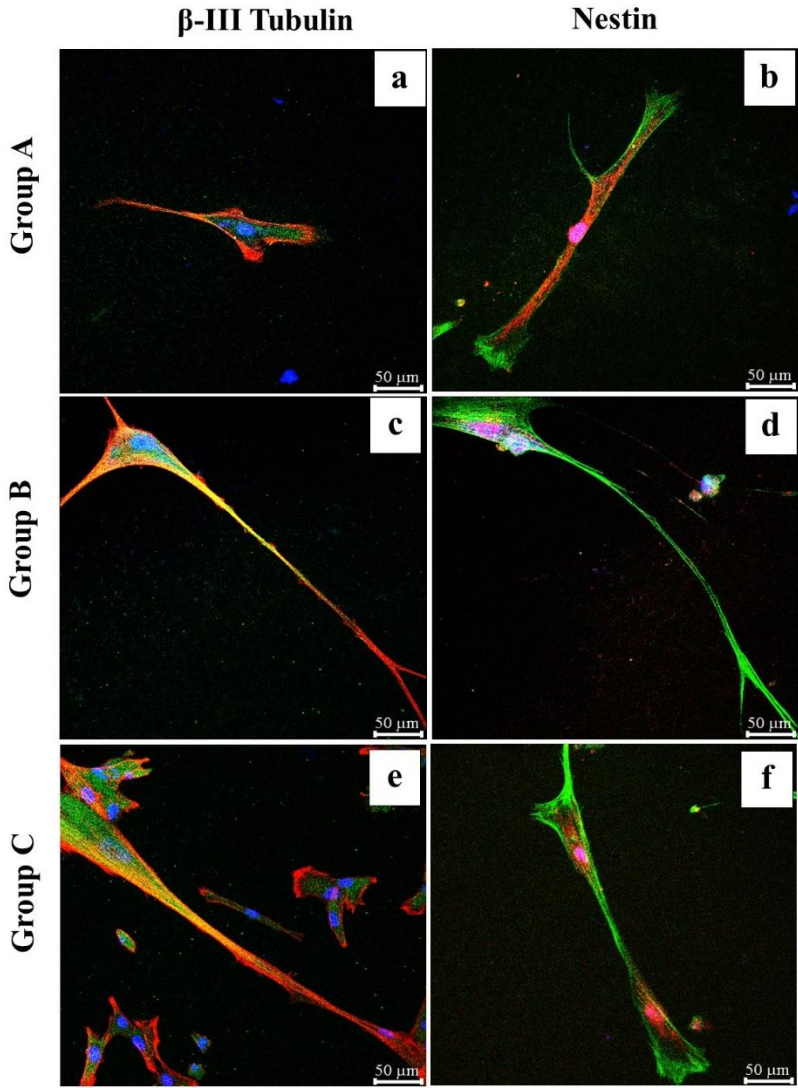

*Fig. S1. Neuronal differentiation of GMSCs: Upon neurogenic induction GMSCs from all the groups displayed similar expression of  $\beta$ -III tubulin (a, c and e) (green; phalloidin – red; DAPI*

– blue nuclei) and nestin (b, d and f) (red; phalloidin – green; DAPI – blue nuclei). (Magnification 40x oil; scale 50  $\mu$ m). The cell size in Group B GMSCs was larger as compared to Group A and Group C after neuronal differentiation.

**Method:** In order to study an age-appropriate effect of GMSCs in animal model of ALI, we also induced ALI in young (6-8 week), adult (15-18 week) and elderly (27-30 week) Swiss albino male mice by intra-nasal administration of LPS at a concentration of 5  $\mu$ g/gm body weight. After 72 hr of LPS administration, young mice were intra-venously injected with  $10^6$  Group A GMSCs. Similarly, adult and elderly mice were administered intra-venously with Group B and Group C GMSCs respectively. The experiments were conducted in triplicate with three individual samples from each group of GMSCs (4 animals per sample, a total of 12 animals for each age group of GMSCs). The experiment was terminated after 96 hr of GMSC administration, by sacrificing the experimental animals and analysing their lung tissues as described earlier section (Fig. S2 and Table S1).

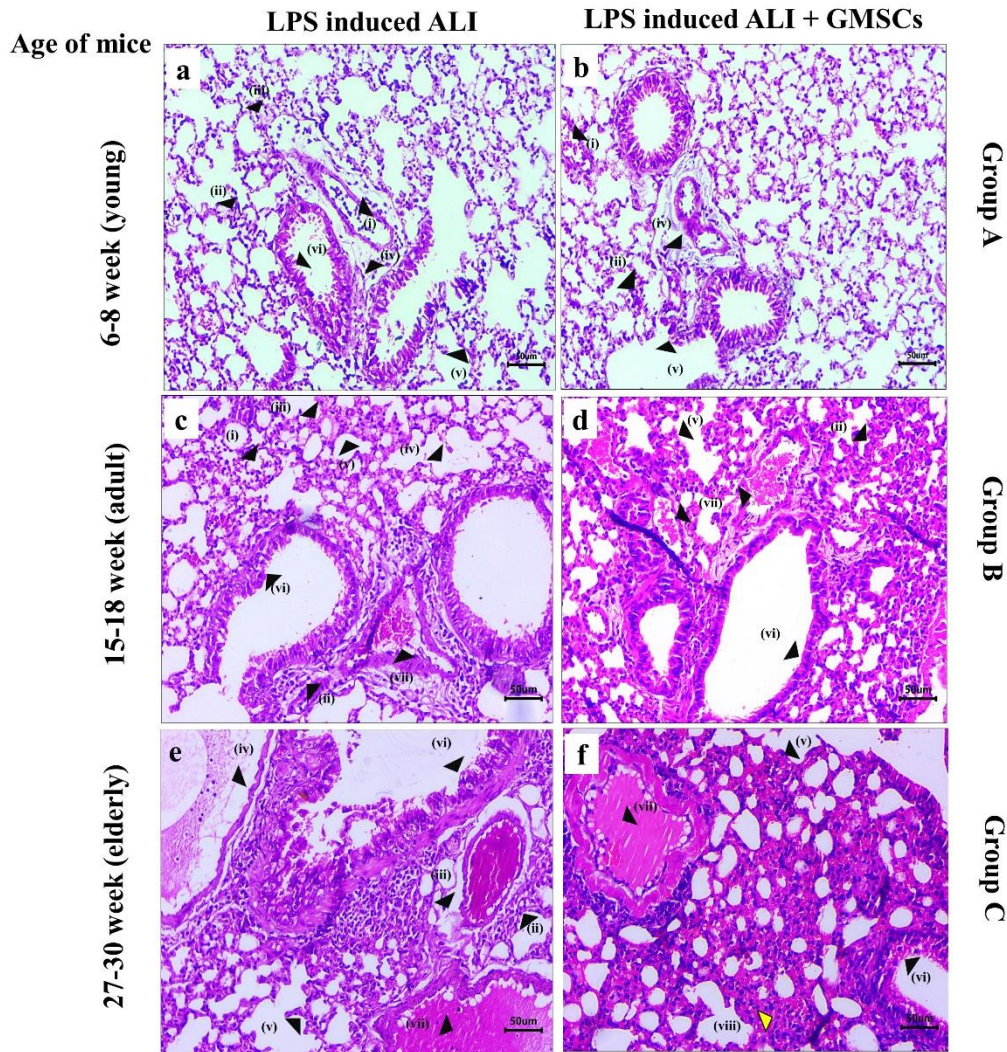

*Fig. S2. Histological analysis of lungs with/without GMSCs administration: (a-f) Histological analysis of LPS induced ALI in young (6-8 week), adult (15-18 week) and elderly (27-30 week) Swiss albino mice, showed maximum severity of lung damage in elderly mice, as represented by large foci of thrombus and accumulation of proteinaceous debris. The mice from varied age groups displayed different parameters of lung injury after 7 days of LPS administration and administration of GMSCs was observed to alleviate those particular parameters. For instance, (b) Group A GMSCs reduced the number of infiltrated neutrophils in the alveolar and interstitial space; lowered the sites of hyaline membrane and proteinaceous debris and also improved the thickness of alveolar septa in young mice. On the other hand, (c and e) both adult and elderly mice respectively, displayed lower infiltration of neutrophils but*

higher instances of proteinaceous debris, hyaline membrane, septal thickening, thrombus formation and intra-alveolar haemorrhages. (d and f) administration of Group B and Group C GMSCs in these mice respectively has been observed to reduce the severity of lung injury with respect to most of the parameters (Magnification 20x; scale 50  $\mu$ m). Histological parameters studied: (i) infiltration of neutrophils in alveoli and (ii) interstitial spaces; (iii) hyaline membrane formed due to fibrin polymerization that leaks into the interstitial/ alveolar space; (iv) presence of proteinaceous debris in the alveolar space (such as fibrin strands); (v) thickening of alveolar septa; (vi) desquamation of alveolar epithelium; (vii) thrombosis; (viii) intra-alveolar haemorrhages.

**Table S1.**

|        | Age of Mice                               | 6-8 week |               | 15-18 week           |                     | 27-30 week                 |                          |
|--------|-------------------------------------------|----------|---------------|----------------------|---------------------|----------------------------|--------------------------|
|        | Groups<br>Criteria                        | LPS      | LPS + Group A | LPS                  | LPS + Group B       | LPS                        | LPS + Group C            |
| (i)    | Neutrophils in alveolar space             | +++++    | +++           | ++++                 | +                   | ++++                       | +                        |
| (ii)   | Neutrophils on interstitial space         | +++++    | +++           | +++++                | +++                 | +++++                      | +++                      |
| (iii)  | Hyaline membrane                          | +++      | -             | ++++                 | ++                  | +++++                      | +                        |
| (iv)   | Proteinaceous debris                      | ++       | +             | +++                  | ++                  | ++++                       | ++                       |
| (v)    | Thickening of alveolar septa              | 3x       | 2x            | 3.5x                 | 2x                  | 3.5x                       | 3x                       |
| (vi)   | Desquamation of alveolar epithelial cells | ++       | +             | ++++                 | +++                 | +++++                      | ++++                     |
| (vii)  | Thrombosis                                | +++      | +             | ++++<br>(large foci) | +++<br>(small foci) | +++++<br>(very large foci) | +++<br>(very small foci) |
| (viii) | Intra-alveolar hemorrhage                 | -        | -             | -                    | +++                 | -                          | +++                      |

*Table S1: Comparative analysis of structural changes in LPS induced ALI with/ without GMSCs administration. Scoring of histological sections of LPS induced ALI in young (6-8 week), adult (15-18 week) and elderly (27-30 week) Swiss albino mice. The mice from varied*

*age groups displayed different parameters of lung injury after 7 days of LPS administration and administration of GMSCs was observed to alleviate those particular parameters. (“+” represents presence of a given parameter in at least 10 locations of a histological section. 8 such sections from different mice of each group were analysed to score the severity of lung damage. All the histological parameters were compared with sham control).*

**Table S2.** List of primers

|     | <b>Gene Name</b>              | <b>Forward Primer</b>     | <b>Reverse Primer</b>   |
|-----|-------------------------------|---------------------------|-------------------------|
|     | <b>Human primers</b>          |                           |                         |
| 1.  | <b>FGFR</b>                   | AAACCGTATGCCCCGTAGCTC     | AGGTGGCATAACGGACCTTG    |
| 2.  | <b>PDGFR</b>                  | ATGCTCAGCAGAGTGTCATCC     | CCACTTCTTTGCGGGGGTA     |
| 3.  | <b>EGFR</b>                   | TATTGATCGGGAGAGCCGGA      | TCGTGCCTTGGCAAACCTTC    |
| 4.  | <b>CDKN1A</b>                 | CCAGCATGACAGATTTCTACCAC   | AGAAGATGTAGAGCGGGCCT    |
| 5.  | <b>CDKN2A</b>                 | CTTGGTGACCCTCCGGATTC      | TCATCATGACCTGGTCTTCTAGG |
| 6.  | <b>p53</b>                    | CCTATGGAAACTACTTCCTGAAAAC | CTGGCATTCTGGGAGCTTCA    |
| 7.  | <b>SIRT1</b>                  | TTGCCGGAAACAATACCTCC      | CCACATGAAACAGACACCCCA   |
| 8.  | <b>GAPDH</b>                  | TCGGAGTCAACGGATTTGGT      | TCGCCCCACTTGATTTTGA     |
|     |                               |                           |                         |
|     | <b>Mouse primers</b>          |                           |                         |
| 9.  | <b>TNF<math>\alpha</math></b> | GTAGCCCACGTCGTAGCAAA      | ACAAGGTACAACCCATCGGC    |
| 10. | <b>TGF<math>\beta</math></b>  | CTGCTGACCCCCACTGATAC      | GGGGCTGATCCCGTTGATT     |
| 11. | <b>IFN<math>\gamma</math></b> | AGACAATCAGGCCATCAGCAA     | TGTGGGTTGTTGACCTCAAACCT |
| 12. | <b>GAPDH</b>                  | CAGGAGAGTGTTTCCTCGTCC     | TTTGCCGTGAGTGGAGTCAT    |
|     |                               |                           |                         |

**Table S3.** List of products with catalogue numbers

| <b>Sr. No.</b> | <b>Product</b>                                | <b>Make</b>   | <b>Catalogue</b> |
|----------------|-----------------------------------------------|---------------|------------------|
| 1.             | Alpha Minimal Essential Media ( $\alpha$ MEM) | Sigma Aldrich | M8042            |
| 2.             | Foetal Bovine Serum (FBS)                     | Gibco         | 16000044         |
| 3.             | Trypsin Phosphate Versene Glucose (TPVG)      | HiMedia       | TCL031           |
| 4.             | Trypan Blue                                   | HiMedia       | TC193            |
| 5.             | Paraformaldehyde                              | HiMedia       | TCL119           |
| 6.             | Eosin                                         | HiMedia       | TC357            |
| 7.             | MTT                                           | Himedia       | MB186            |
| 8.             | Anti-human CD44                               | BD Bioscience | 560977           |
| 9.             | Anti-human CD90                               | BD Bioscience | 560977           |
| 10.            | Anti-human CD73                               | eBioscience   | 12073942         |
| 11.            | Anti-human CD105                              | eBioscience   | 12105742         |
| 12.            | Anti-human CD34                               | BD Bioscience | 560941           |
| 13.            | Anti-human CD45                               | BD Bioscience | 560974           |
| 14.            | X-Gal                                         | HiMedia       | MB069            |
| 15.            | GoTaq qPCR Master Mix                         | Promega       | A6001            |
| 16.            | iScript cDNA Synthesis Kit                    | BioRad        | 1708890          |
| 17.            | Adipogenic Differentiation Kit                | Lonza         | PT3004           |
| 18.            | Laminin                                       | Invitrogen    | 23017015         |
| 19.            | Poly-D-Lysine                                 | MP Biomedical | 150175           |



|     |                                                   |                          |              |
|-----|---------------------------------------------------|--------------------------|--------------|
| 20. | DMEM-F12                                          | Gibco                    | 11320033     |
| 21. | Fibroblast Growth Factor 2 (FGF2)                 | Gibco                    | PHG0024      |
| 22. | Epidermal Growth Factor (EGF)                     | Gibco                    | PHG0314      |
| 23. | N2 Supplement                                     | Gibco                    | 17502048     |
| 24. | Anti-Human Nestin conjugated with Alexa fluor 555 | Invitrogen               | MA1-110-A555 |
| 25. | Anti-Human $\beta$ III Tubulin                    | Invitrogen               | MA1-19187    |
| 26. | Goat Anti-mouse FITC                              | Invitrogen               | F-2761       |
| 27. | Ultra Cruz Mounting Medium                        | Santa Cruz Biotechnology | sc-24941     |
| 28. | StemPro Osteogenic Differentiation Kit            | Gibco                    | A10072-01    |
| 29. | Alizarin Red S                                    | Sigma Aldrich            | A5533        |
| 30. | Para-nitro phenol phosphate (pNPP)                | SRL                      | 144816       |
| 31. | AMP                                               | Sigma Aldrich            | A9199        |
| 32. | Para-nitro phenol (pNP)                           | Sigma Aldrich            | N7660        |
| 33. | Anti-Human Osteocalcin                            | Abcam                    | ab93876      |
| 34. | Anti-Human Collagen Type I                        | Abcam                    | ab34710      |
| 35. | Donkey Anti-rabbit FITC                           | Santa Cruz Biotechnology | sc-2090      |
| 36. | Phytohemagglutinin (PHA)                          | Sigma Aldrich            | 11082132001  |
| 37. | Histopaque                                        | Sigma Aldrich            | 10771        |
| 38. | Lipopolysaccharide                                | Sigma Aldrich            | L8274        |
| 39. | PowerUp SYBR Green Master Mix                     | Applied Biosystems       | A25742       |
| 40. | Verso cDNA Synthesis Kit                          | Invitrogen               | ab1453A      |

|     |                                                          |               |       |
|-----|----------------------------------------------------------|---------------|-------|
| 41. | Formaldehyde                                             | HiMedia       | AS127 |
| 42. | Rhodamine Phalloidin                                     | Invitrogen    | R415  |
| 43. | Phalloidin FITC                                          | Sigma Aldrich | P5282 |
| 44. | DAPI (4',6-Diamidino-2-Phenylindole,<br>Dihydrochloride) | Invitrogen    | D1306 |
| 45. | Oil Red O                                                | Sigma Aldrich | O0625 |

**Video. S1.** Time dependent *in vitro* migration of GMSCs for wound healing.
